# Supplementary material for: Ethical considerations in the prehospital treatment of out-of-hospital cardiac arrest: A multi-centre, qualitative study
Source: PubMed Central journal article supplement (PMC10370897; doi:10.1371/journal.pone.0284826), 2023-07-26
Supplement: pone.0284826.s002.pdf [file pone.0284826.s002.pdf]

## Appendix 2: Translated interview guide

| Categories                     | Explanation                                                                                                                 | Questions                                                                                                                                                                                                                                                                                                                                                                                                                                                                                                                                                                                                                                                             |
|--------------------------------|-----------------------------------------------------------------------------------------------------------------------------|-----------------------------------------------------------------------------------------------------------------------------------------------------------------------------------------------------------------------------------------------------------------------------------------------------------------------------------------------------------------------------------------------------------------------------------------------------------------------------------------------------------------------------------------------------------------------------------------------------------------------------------------------------------------------|
| <b>Experience</b>              | The level of experience of the participants                                                                                 | <ul style="list-style-type: none"> <li>• How long have you worked as a prehospital physician?</li> <li>• What are your sub-speciality in anaesthesiology besides prehospital medicine?</li> </ul>                                                                                                                                                                                                                                                                                                                                                                                                                                                                     |
| <b>Decision-making process</b> | Open reflection on factors playing into decision-making<br><br><b><u>AWARENESS</u></b> on areas that needs further probing! | <ul style="list-style-type: none"> <li>• Try telling me about the cardiac arrest situation we experienced today as you remember it.</li> <li>• What considerations did you make in relation to the cardiac arrest?</li> <li>• What factors played a part in your final decision? <i>Was it one single factors that made you decide?</i></li> <li>• Would you have done anything differently? <i>If yes, why? If no, why not?</i></li> <li>• How did it feel to make the decision?</li> <li>• How do you experience withholding resuscitation compared to terminating already initiated resuscitation?</li> <li>• Who were involved in your final decision?</li> </ul> |
| <b>Individual factors</b>      | Other factors that may have an influence provided that they haven't been mentioned in the answers to the questions above.   | <ul style="list-style-type: none"> <li>• What part do the patient's age play?</li> <li>• Can you describe an OHCA situation you experienced as difficult or challenging?</li> <li>• Are there any groups of patients who complicate a cardiac arrest situation? <i>If yes, which?</i></li> <li>• What part do relatives play for you?</li> <li>• What are your opinions on advance directives or DNACPR? <i>Both verbal and in writing.</i></li> </ul>                                                                                                                                                                                                                |
| <b>Closing questions</b>       | The experience of ethics and ethical challenges                                                                             | <p>What are your understanding of ethics in prehospital treatment?</p> <p>How do you use your understanding in your work?</p> <p><i>Do you have anything to add? Something we haven't touched upon?</i></p>                                                                                                                                                                                                                                                                                                                                                                                                                                                           |
