# Supplementary material for: Ethical considerations in the prehospital treatment of out-of-hospital cardiac arrest: A multi-centre, qualitative study
Source: PubMed Central journal article supplement (PMC10370897; doi:10.1371/journal.pone.0284826), 2023-07-26
Supplement: pone.0284826.s003.pdf [file pone.0284826.s003.pdf]

### Appendix 3: Translated observation and field note guide

| Category                           | Includes                                                                                                                                                                                         | Additional registrations                                                                                                                                                                                                                                                                                                                                                                                                                          |
|------------------------------------|--------------------------------------------------------------------------------------------------------------------------------------------------------------------------------------------------|---------------------------------------------------------------------------------------------------------------------------------------------------------------------------------------------------------------------------------------------------------------------------------------------------------------------------------------------------------------------------------------------------------------------------------------------------|
| Appearance                         | <ul style="list-style-type: none"> <li>• Clothes</li> <li>• Age</li> <li>• Gender</li> <li>• Physical appearance</li> </ul>                                                                      | Profession, social status, socioeconomic level (estimated), religion, ethnicity                                                                                                                                                                                                                                                                                                                                                                   |
| Verbal interactions and behaviour  | <ul style="list-style-type: none"> <li>• Who talks with who</li> <li>• For how long</li> <li>• Who initiates the conversation</li> <li>• Language or dialect</li> <li>• Tone of voice</li> </ul> | <ul style="list-style-type: none"> <li>- Clothes</li> <li>- Age</li> <li>- Gender</li> <li>- Physical appearance</li> </ul> ^The one speaking<br>Dynamic of the interaction<br><br>How much of the conversations concern other things than medical/clinical topics?<br><b>Attention on ethical challenges:</b> Are they addressed? Who initiates conversations on ethics (relatives, EMT/paramedic/ physician/others? How is the prompt received? |
| Physical behaviour and interaction | <ul style="list-style-type: none"> <li>• What do people do?</li> <li>• Who does what?</li> <li>• Who interacts with who?</li> <li>• Who does not interact with anyone?</li> </ul>                | How do people use their body language and tone of voice to communicate potential feelings?<br>What actions do people do to indicate potential feelings towards each other, social rank or profession?                                                                                                                                                                                                                                             |
| Personal space                     | <ul style="list-style-type: none"> <li>• How close are people to each other?</li> </ul>                                                                                                          | What do the individuals' personal space preferences mean for the interaction?                                                                                                                                                                                                                                                                                                                                                                     |
| Human traffic                      | <ul style="list-style-type: none"> <li>• People who enter, exit or are present (<b>ONE SCENE</b>)</li> </ul>                                                                                     | Where do people leave and exit from? How long do they stay? Who are they? (ethnicity, age, gender)? Are they alone or together with someone?<br><b>Number of people</b>                                                                                                                                                                                                                                                                           |
| Noticeable people                  | <ul style="list-style-type: none"> <li>• Identification of people who receive a lot of attention from others</li> </ul>                                                                          | Characteristics of noticeable individuals: What differentiates them from others? Are people approaching them?<br><b>How does the physician appear? Approachable? Open to suggestions?</b>                                                                                                                                                                                                                                                         |

**REMEMBER: Objective descriptions!**

Document: Events and conversations, note body language, ambience, attitudes, the environment in general, and interactions between participants. **OTHER RELEVANT INFORMATION (e.g. my perception of situations, subjective analysis)**

**REMEMBER: Drawings of the observation localisation (setting)**
